# Supplementary material
Source: publisher figshare collection journal article supplement (https://sage.figshare.com/ndownloader/files/18046151)
Supplement: Supplementary file 1 [file 18046151]

#Repressive Agent Defection: How Power, Costs, and Uncertainty Influence Military Behavior and State Repression 


options(stringsAsFactors = FALSE)
pkgs <- c("readxl", "haven", "readr", "assertthat", "naniar","plyr","countrycode", "haven", "dplyr", "stargazer","sandwich", "lmtest", "MASS")   
invisible(lapply(pkgs, library, character.only = TRUE, quietly = TRUE))

setwd("~/Dropbox/KFruge_MilDefect/")
load("./MilDefect_Dat.RData")


# Lag all independent variables by one year that were not already done

dat <- ddply(dat, .(ccode), transform, l.log.irst = 
                  c(NA, log.irst[-length(log.irst)]
                  )
)

dat <- ddply(dat, .(ccode), transform, l.log.milex = 
                  c(NA, log.milex[-length(log.milex)]
                  )
)

dat <- ddply(dat, .(ccode), transform, l.log.milper = 
                  c(NA, log.milper[-length(log.milper)]
                  )
)


dat <- ddply(dat, .(ccode), transform, l.log.pec = 
                  c(NA, log.pec[-length(log.pec)]
                  )
)

dat <- ddply(dat, .(ccode), transform, l.log.upop = 
                  c(NA, log.upop[-length(log.upop)]
                  )
)


dat <- ddply(dat, .(ccode), transform, l.purge4 = 
                  c(NA, purge4[-length(purge4)]
                  )
)

dat <- ddply(dat, .(ccode), transform, l.pastpurge4 = 
                  c(NA, pastpurge4[-length(pastpurge4)]
                  )
)


dat <- ddply(dat, .(ccode), transform, l.recency_purge = 
                  c(NA, recency_purge[-length(recency_purge)]
                  )
)

dat <- ddply(dat, .(ccode), transform, l.military = 
                  c(NA, gwf_military[-length(gwf_military)]
                  )
)


dat <- ddply(dat, .(ccode), transform, l.party = 
                  c(NA, gwf_party[-length(gwf_party)]
                  )
)

dat <- ddply(dat, .(ccode), transform, l.monarchy = 
                  c(NA, gwf_monarchy[-length(gwf_monarchy)]
                  )
)

dat <- ddply(dat, .(ccode), transform, l.personal = 
                  c(NA, gwf_personal[-length(gwf_personal)]
                  )
)


# cluster robust standard error function
robust.se <- function(model, cluster){
     require(sandwich)
     require(lmtest)
     M <- length(unique(cluster))
     N <- length(cluster)
     K <- model$rank
     dfc <- (M/(M - 1)) * ((N - 1)/(N - K))
     uj <- apply(estfun(model), 2, function(x) tapply(x, cluster, sum));
     rcse.cov <- dfc * sandwich(model, meat = crossprod(uj)/N)
     rcse.se <- coeftest(model, rcse.cov)
     return(rcse.se)
}


# Keep just the complete data (this is for the robust standard errors function)

cmp.dat<- dat[complete.cases(dat[, c("ccode", "year", "pir_latentmean","l.log.irst", "l.log.milex", "l.log.milper", "l.pastpurge4","l.recency_purge",  "Leleg", "Lop2", "Lcivilwar",  "Llnrgdppc", "Llnpop", "Loil", "Llji")]), ]


#Model 1 in the paper 

m2.r<- lm(formula = pir_latentmean ~ l.recency_purge + l.log.irst + l.log.milex + Leleg + Lop2 + Lcivilwar + Llnrgdppc + Llnpop + Loil + Llji +  factor(year) + l.recency_purge*Llji, data = cmp.dat)

se2.r <- robust.se(m2.r, cluster=cmp.dat$ccode)

#Model 2 in the paper 
m3.r <- lm(formula = pir_latentmean ~ l.recency_purge + l.log.irst + l.log.milex + Leleg + Lop2 + Lcivilwar + Llnrgdppc + Llnpop + Loil + Llji +  factor(year) + l.recency_purge*Lop2, data = cmp.dat)

se3.r <- robust.se(m3.r, cluster=cmp.dat$ccode)

#Model 3 in the paper 
m4.r <- lm(formula = pir_latentmean ~ l.recency_purge + l.log.irst + l.log.milex + Leleg + Lop2 + Lcivilwar + Llnrgdppc + Llnpop + Loil + Llji +  factor(year) + l.recency_purge*Lop2 + l.recency_purge*Llji, data = cmp.dat)
se4.r <- robust.se(m4.r, cluster=cmp.dat$ccode)


#Table 1 in the paper 
stargazer(m2.r, m3.r, m4.r, style="apsr",
          covariate.labels = c("Weighted Past Purge", "Iron/Steel", "Military Expenditures","Elected Legislature", "Opposition Party", "Civil War", "GDP per capita", "Population", "Oil Rents", "Judicial Independence", "Weighted Past Purge * Opposition Party", "Weighted Past Purge * Judicial Independence"),
          omit.stat="f", 
          se = list(se2.r[,2], se3.r[,2], se4.r[,2]),
          intercept.bottom=TRUE, 
          type="latex", 
          out="./work/text/table1redo_r.tex",
          dep.var.labels.include= FALSE, 
          omit = "year"
)


library(interplot)


# Marginal Effects Plots for Model 3 

interplot(m= m4.r, var1 = "l.recency_purge", var2="Llji", hist=TRUE)  + 
     xlab("Latent Judicial Independence") + 
     ylab("Estimated Coefficient for \nWeighted Military Purges") + 
     theme_light()+ 
     geom_hline(yintercept = 0, linetype="dashed")

interplot(m= m4.r, var2 = "l.recency_purge", var1="Llji", hist=TRUE)  + 
     ylab("Estimated Coefficient for \nLatent Judicial Independence") + 
     xlab("Weighted Military Purges") + 
     theme_light()+ 
     geom_hline(yintercept = 0, linetype="dashed")


cmp.dat$Lop2 <- as.factor(cmp.dat$Lop2)

interplot(m= m4.r, var1 = "l.recency_purge", var2="Lop2", hist=TRUE, point=TRUE)  + 
     xlab("Opposition Party Existence") + 
     ylab("Estimated Coefficient for \nWeighted Military Purges") + 
     theme_light()+ 
     geom_hline(yintercept = 0, linetype="dashed")

interplot(m= m4.r, var2 = "l.recency_purge", var1="Lop2", hist=TRUE)  + 
     ylab("Estimated Coefficient for \nOpposition Party Existence") + 
     xlab("Weighted Military Purges") + 
     theme_light()+ 
     geom_hline(yintercept = 0, linetype="dashed")


# Data Visualization plots 
#Density - Purge 
ggplot(cmp.dat, aes(x=recency_purge)) +
     geom_density() + 
     theme_light() + 
     labs(x="Weighted Past Purges")


#Density - LJI 
ggplot(cmp.dat, aes(x=Llji)) + 
     geom_density()+
     theme_light() + 
     labs(x= "Latent Judicial Independence")


# Appendix 

# Plots for Model 1 and 2 

interplot(m= m3.r, var1 = "l.recency_purge", var2="Lop2", hist=TRUE, point=TRUE)  + 
     xlab("Opposition Party Existence") + 
     ylab("Estimated Coefficient for \nWeighted Military Purges") + 
     theme_light()+ 
     geom_hline(yintercept = 0, linetype="dashed")


interplot(m= m3.r, var2 = "l.recency_purge", var1="Lop2", hist=TRUE)  + 
     ylab("Estimated Coefficient for \nOpposition Party Existence") + 
     xlab("Weighted Military Purges") + 
     theme_light()+ 
     geom_hline(yintercept = 0, linetype="dashed")


interplot(m= m2.r, var1 = "l.recency_purge", var2="Llji", hist=TRUE)  + 
     xlab("Latent Judicial Independence") + 
     ylab("Estimated Coefficient for \nWeighted Military Purges") + 
     theme_light()+ 
     geom_hline(yintercept = 0, linetype="dashed")

interplot(m= m2.r, var2 = "l.recency_purge", var1="Llji", hist=TRUE)  + 
     ylab("Estimated Coefficient for \nLatent Judicial Independence") + 
     xlab("Weighted Military Purges") + 
     theme_light()+ 
     geom_hline(yintercept = 0, linetype="dashed")


#Models using CIRI Data 
app1 <- polr(as.factor(ciri) ~ l.recency_purge + l.log.irst + l.log.milex + Leleg + Lop2 + Lcivilwar + Llnrgdppc + Llnpop + Loil + Llji +  factor(year) + l.recency_purge*Lop2, data = cmp.dat.app, Hess=TRUE)

app2 <- polr(as.factor(ciri) ~ l.recency_purge + l.log.irst + l.log.milex + Leleg + Lop2 + Lcivilwar + Llnrgdppc + Llnpop + Loil + Llji +  factor(year) +  l.recency_purge*Llji, data = cmp.dat.app, Hess=TRUE)

app3 <- polr(as.factor(ciri) ~ l.recency_purge + l.log.irst + l.log.milex + Leleg + Lop2 + Lcivilwar + Llnrgdppc + Llnpop + Loil + Llji +  factor(year) + l.recency_purge*Lop2 + l.recency_purge*Llji, data = cmp.dat.app, Hess=TRUE)

stargazer(app1, app2, app3, style="apsr",
          covariate.labels = c("Weighted Past Purge", "Iron/Steel", "Military Expenditures","Elected Legislature", "Opposition Party", "Civil War", "GDP per capita", "Population", "Oil Rents", "Judicial Independence", "Weighted Past Purge * Opposition Party", "Weighted Past Purge * Judicial Independence"),
          omit.stat="f", 
          intercept.bottom=TRUE, 
          type="latex", 
          out="./work/text/app_alts.tex",
          dep.var.labels.include= FALSE, 
          omit = "year"
)


#Marginal effects plots for CIRI data 
interplot(m= app1, var1 = "l.recency_purge", var2="Llji", hist=TRUE)  + 
     xlab("Latent Judicial Independence") + 
     ylab("Estimated Coefficient for \nWeighted Military Purges") + 
     theme_light()+ 
     geom_hline(yintercept = 0, linetype="dashed")

interplot(m= app1, var2 = "l.recency_purge", var1="Llji", hist=TRUE)  + 
     ylab("Estimated Coefficient for \nLatent Judicial Independence") + 
     xlab("Weighted Military Purges") + 
     theme_light()+ 
     geom_hline(yintercept = 0, linetype="dashed")

cmp.dat.app$Lop2 <- as.factor(cmp.dat.app$Lop2)

interplot(m= app1, var1 = "l.recency_purge", var2="Lop2", hist=TRUE, point=TRUE)  + 
     xlab("Opposition Party Existence") + 
     ylab("Estimated Coefficient for \nWeighted Military Purges") + 
     theme_light()+ 
     geom_hline(yintercept = 0, linetype="dashed")

interplot(m= app1, var2 = "l.recency_purge", var1="Lop2", hist=TRUE)  + 
     ylab("Estimated Coefficient for \nOpposition Party Existence") + 
     xlab("Weighted Military Purges") + 
     theme_light()+ 
     geom_hline(yintercept = 0, linetype="dashed")


# unweighted DV 

cmp.dat<- dat[complete.cases(dat[, c("ccode", "year", "pir_latentmean","l.log.irst", "l.log.milex", "l.log.milper", "l.pastpurge4","l.recency_purge",  "Leleg", "Lop2", "Lcivilwar",  "Llnrgdppc", "Llnpop", "Loil", "Llji")]), ]


m1 <- lm(formula = pir_latentmean ~ l.pastpurge4 + l.log.irst + l.log.milex + Leleg + Lop2 + Lcivilwar + Llnrgdppc + Llnpop + Loil + Llji +  factor(year), data = cmp.dat) 

se1 <- robust.se(m1, cluster=cmp.dat$ccode)


m2 <- lm(formula = pir_latentmean ~ l.pastpurge4 + l.log.irst + l.log.milex + Leleg + Lop2 + Lcivilwar + Llnrgdppc + Llnpop + Loil + Llji +  factor(year) + l.pastpurge4*Llji, data = cmp.dat)

se2 <- robust.se(m2, cluster=cmp.dat$ccode)


m3 <- lm(formula = pir_latentmean ~ l.pastpurge4 + l.log.irst + l.log.milex + Leleg + Lop2 + Lcivilwar + Llnrgdppc + Llnpop + Loil + Llji +  factor(year) + l.pastpurge4*Lop2, data = cmp.dat)

se3 <- robust.se(m3, cluster=cmp.dat$ccode)


m4 <- lm(formula = pir_latentmean ~ l.pastpurge4 + l.log.irst + l.log.milex + Leleg + Lop2 + Lcivilwar + Llnrgdppc + Llnpop + Loil + Llji +  factor(year) + l.pastpurge4*Lop2 + l.pastpurge4*Llji, data = cmp.dat)
se4 <- robust.se(m4, cluster=cmp.dat$ccode)


stargazer(m2, m3, m4, style="apsr",
          covariate.labels = c("Past Purge", "Iron/Steel", "Military Expenditures","Elected Legislature", "Opposition Party", "Civil War", "GDP per capita", "Population", "Oil Rents", "Judicial Independence", "Past Purge * Opposition Party", "Past Purge * Judicial Independence"),
          omit.stat="f", 
          se = list(se2[,2], se3[,2], se4[,2]),
          intercept.bottom=TRUE, 
          type="latex", 
          out="./work/text/table1redo.tex",
          dep.var.labels.include= FALSE, 
          omit = "year"
)


#Random Forest (Takes awhile) 

library(party)
library(dplyr)
library(ggplot2)

rf <- cforest(pir_latentmean ~l.purge4 + l.recency_purge + l.pastpurge4 + l.log.irst + l.log.milex + Leleg + Lop2 + Lcivilwar + Llnrgdppc + Llnpop + Loil + Llji +  factor(year), data=cmp.dat)

vi<- varimp(rf)

vi_df <- data.frame(variable = names(vi), importance = vi) %>% 
     mutate(highlight = ifelse(variable %in% c("l.pastpurge4", "l.recency_purge", "l.purge4"), "Purge Variables", "Control Variables"),
            variable = reorder(variable, importance)) 


ggplot(vi_df, 
       aes(x = importance, 
           y = variable,
           color= highlight)) + 
     geom_point() + 
     theme_light()


# Broken down by regime type 
cmp.dat.party<- dat[complete.cases(dat[, c("ccode", "year", "pir_latentmean","l.log.irst", "l.log.milex", "l.log.milper", "l.pastpurge4","l.recency_purge", "Lcivilwar",  "Llnrgdppc", "Llnpop", "Loil", "l.military", "l.party", "l.personal", "l.monarchy")]) & dat$l.party==1, ]

cmp.dat.military<- dat[complete.cases(dat[, c("ccode", "year", "pir_latentmean","l.log.irst", "l.log.milex", "l.log.milper", "l.pastpurge4","l.recency_purge", "Lcivilwar",  "Llnrgdppc", "Llnpop", "Loil", "l.military", "l.party", "l.personal", "l.monarchy")]) & dat$l.military==1, ]

cmp.dat.personal<- dat[complete.cases(dat[, c("ccode", "year", "pir_latentmean","l.log.irst", "l.log.milex", "l.log.milper", "l.pastpurge4","l.recency_purge", "Lcivilwar",  "Llnrgdppc", "Llnpop", "Loil", "l.military", "l.party", "l.personal", "l.monarchy")]) & dat$l.personal==1, ]

cmp.dat.monarchy<- dat[complete.cases(dat[, c("ccode", "year", "pir_latentmean","l.log.irst", "l.log.milex", "l.log.milper", "l.pastpurge4","l.recency_purge", "Lcivilwar",  "Llnrgdppc", "Llnpop", "Loil", "l.military", "l.party", "l.personal", "l.monarchy")]) & dat$l.monarchy==1, ]

m2.r.party<- lm(formula = pir_latentmean ~ l.recency_purge + l.log.irst + l.log.milex + Leleg + Lop2 + Lcivilwar + Llnrgdppc + Llnpop + Loil + Llji + l.recency_purge*Llji, data = cmp.dat.party)

m2.r.military<- lm(formula = pir_latentmean ~ l.recency_purge + l.log.irst + l.log.milex + Leleg + Lop2 + Lcivilwar + Llnrgdppc + Llnpop + Loil + Llji  + l.recency_purge*Llji, data = cmp.dat.military)

m2.r.personal<- lm(formula = pir_latentmean ~ l.recency_purge + l.log.irst + l.log.milex + Leleg + Lop2 + Lcivilwar + Llnrgdppc + Llnpop + Loil + Llji  + l.recency_purge*Llji, data = cmp.dat.personal)

m2.r.monarchy<- lm(formula = pir_latentmean ~ l.recency_purge + l.log.irst + l.log.milex + Leleg + Lop2 + Lcivilwar + Llnrgdppc + Llnpop + Loil + Llji  + l.recency_purge*Llji, data = cmp.dat.monarchy)

stargazer(m2.r.party, m2.r.personal, m2.r.military, m2.r.monarchy, style="apsr",
          covariate.labels = c("Weighted Past Purge (WPP)", "Iron/Steel", "Military Expenditures","Elected Legislature", "Opposition Party", "Civil War", "GDP per capita", "Population", "Oil Rents", "Judicial Independence (LJI)", "WPP * LJI"),
          omit.stat="f", 
          intercept.bottom=TRUE, 
          type="latex", 
          out="./work/text/different_regime_check.tex",
          dep.var.labels.include= FALSE, 
          omit = "year", 
          column.labels= c("Party", "Personal", "Military", "Monarchy")
)


#Cheibub, Jos ́e Antonio, Jennifer Gandhi and James Raymond Vreeland. 2010. “Democracy and dictatorship revisited.” Public choice 143(1-2):67–101. 

# Cingranelli, David L and David L Richards. 1999. “Measuring the level, pattern, and sequence of government respect for physical integrity rights.” International studies quarterly 43(2):407–417.


#Cingranelli, David L, David L Richards and K Chad Clay. 2014. “The CIRI Human Rights Dataset. Version 2014.04. 14.”.URL: http: // www. humanrightsdata. com.


#Conrad, Courtenay R, Jillienne Haglund and Will H Moore. 2013. “Disaggregating torture allega- tions: Introducing the ill-treatment and torture (ITT) country-year data.” International Studies Perspectives 14(2):199–220.

#Conrad, Courtenay R, Will H Moore, Jamie Arntson-Kynn, Claudia Artiles, Eyal Bar, Matt Carter, Jill Haglund, Emma Longster, Marlee McCleary, Jessica Meija et al. 2010. “The Ill-Treatment & Torture (ITT) Data Project Coding Rules & Norms.”. URL: http: // www. politicalscience. uncc. edu/ cconra16/ UNCC/ Data. html


#Fariss, Christopher J. 2014. “Respect for Human Rights has Improved Over Time: Modeling the Changing Standard of Accountability.” American Political Science Review 108(02):297–318.


#Geddes, Barbara, Joseph Wright and Erica Frantz. 2014. “Autocratic breakdown and regime transitions: A new data set.” Perspectives on Politics 12(2):313–331.

#Gibney, Mark, Linda Cornett and Reed M. Wood. 2013. “Political Terror Scale.”. URL: http: // www. politicalterrorscale. org/

#Gibney, Mark and Matthew Dalton. 1996. “The political terror scale.” Policy Studies and Developing Nations 4(1):73–84.

#Gleditsch, Kristian Skrede. 2002. “Expanded trade and GDP data.” Journal of Conflict Resolution 46(5):712–724.

#Gleditsch, Nils Petter, Peter Wallensteen, Mikael Eriksson, Margareta Sollenberg and H ̊avard Strand. 2002. “Armed conflict 1946-2001: A new dataset.” Journal of peace research 39(5):615– 637.


#Harff, Barbara. 2003. “No lessons learned from the Holocaust? Assessing risks of genocide and political mass murder since 1955.” American Political Science Review 97(1):57–73.

#Harff, Barbara and Ted Robert Gurr. 1988. “Toward empirical theory of genocides and politicides: Identification and measurement of cases since 1945.” International Studies Quarterly 32(3):359– 371.

#Hathaway, Oona A. 2002. “Do Human Rights Treaties Make a Difference?” The Yale Law Journal 111(8):1935–2042.

#Linzer, Drew A and Jeffrey K Staton. 2011. “A measurement model for synthesizing multiple comparative indicators: The case of judicial independence.” Unpublished manuscript .


#Rivera, Mauricio. 2017. “Authoritarian Institutions and State Repression: The Divergent Effects of Legislatures and Opposition Parties on Personal Integrity Rights.” Journal of Conflict Resolution 61(10):2183–2207.

# Singer, J David. 1988. “Reconstructing the correlates of war dataset on material capabilities of states, 1816–1985.” International Interactions 14(2):115–132.

# Singer, J David, Stuart Bremer and John Stuckey. 1972. “Capability distribution, uncertainty, and major power war, 1820-1965.” Peace, war, and numbers 19:48.

#Sudduth, Jun Koga. 2017. “Strategic logic of elite purges in dictatorships.” Comparative Political Studies 50(13):1768–1801.
